# Supplementary material for: Versatile superhydrophobic and photocatalytic films generated from TiO2–SiO2@PDMS and their applications on fabrics
Source: Royal Society of Chemistry journal article supplement (doi:10.1039/c3ta14942k), 2014-01-01
Supplement: c3ta14942k.pdf [file c3ta14942k.pdf]

## Supporting Information for

# Versatile Superhydrophobic and Photocatalytic Films Generated from $\text{TiO}_2\text{-SiO}_2\text{@PDMS}$ and their Applications on Fabrics

Zheng-Yan Deng, Wei Wang, Li-Hua Mao, Cai-Feng Wang, Su Chen\*

State Key Laboratory of Material-Oriented Chemical Engineering and College of  
Chemistry and Chemical Engineering, Nanjing University of Technology, Nanjing  
210009, P. R. China

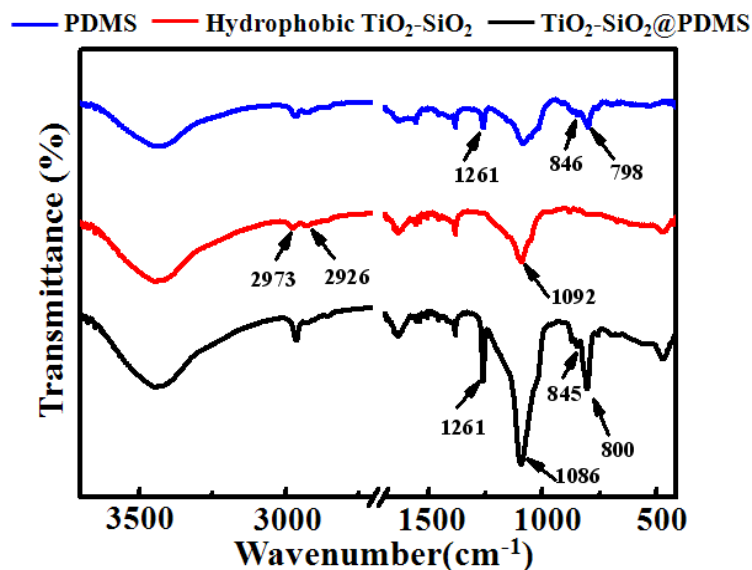

**Figure S1.** FT-IR spectra of polymer PDMS (blue), hydrophobic  $\text{TiO}_2\text{-SiO}_2$  (red), and  $\text{TiO}_2\text{-SiO}_2\text{@PDMS}$  hybrid powder (black).

The FTIR spectra of hydrophobic  $\text{TiO}_2\text{-SiO}_2$  hybrid gels should have been assigned to the hydrolysis of HMDS monomers to replace the Si-OH or Ti-OH groups with  $-\text{Si}(\text{CH}_3)_3$  and  $\text{Ti-Si}(\text{CH}_3)_3$  groups, which are attributed to the hydrophobicity

of hybrid gels. The absorption bands observed at 2973 and 2926  $\text{cm}^{-1}$  are due to C–H stretching. For PDMS-containing hybrid powder, the additional absorption bands at about 1261  $\text{cm}^{-1}$  (Si-CH<sub>3</sub> stretching) and 845 (CH<sub>2</sub> rocking) conform the existence of -CH<sub>3</sub> groups on the surface of modified hybrid gels. It is worth noting that the peak intensity of at 1086  $\text{cm}^{-1}$  markedly increases and becomes higher than that hybrid powder gels and pure PDMS, which results in the introduction of Si-O-Si stretching vibrations.

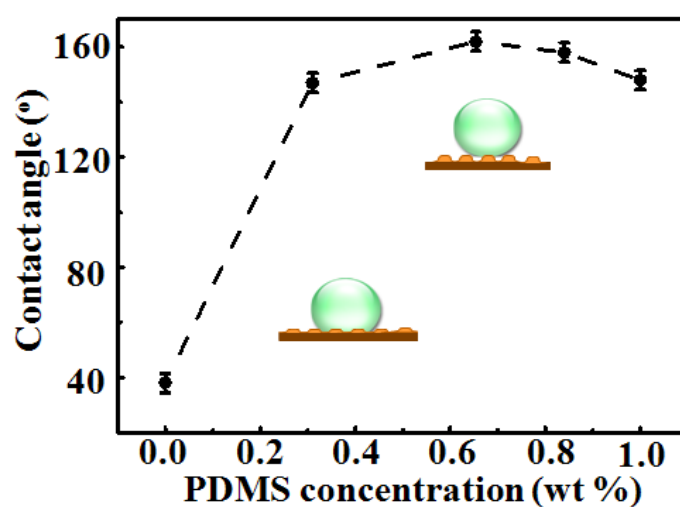

**Figure S2.** Effect of PDMS concentration on water contact angle (WCA) values

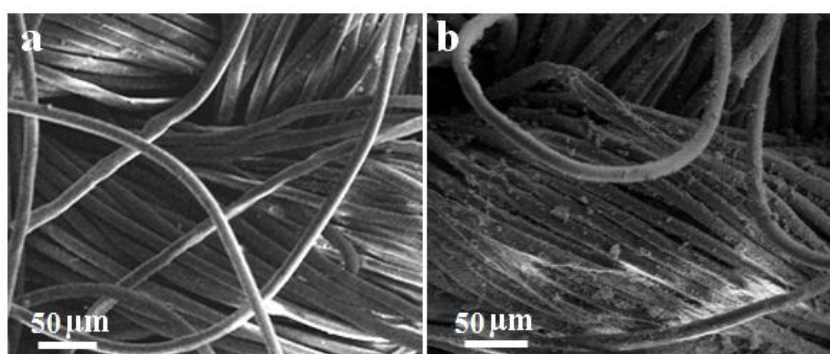

**Figure S3.** SEM images of the polyester/cotton fabrics. (a) The pristine fabrics, scale bar: 50  $\mu\text{m}$ . (b) Treated fabrics, scale bar: 50  $\mu\text{m}$
